# Supplementary material
Source: publisher figshare collection journal article supplement (https://geolsoc.figshare.com/articles/dataset/_/3453668)
Supplement: Supplementary file 1 [file 1]

**Supplementary Table 2 - Sample descriptions and photos**

Vincent, H., Wach, G. Wach., Kettanah, Y., Heavy mineral record of Andean uplift and changing sediment sources across the northeastern margin of South America; a case study from Trinidad and Barbados.

| Sample number & location  | Outcrop or hand specimen description                                                                                                                                                                          | Outcrop photo                                                                        | Sample Photo |
|---------------------------|---------------------------------------------------------------------------------------------------------------------------------------------------------------------------------------------------------------|--------------------------------------------------------------------------------------|--------------|
| HV6017, Puerto Grande Bay | Very fine grained, trough cross bedded sand with scattered organic fragments; bioturbated; thickening-upward parasequence capped by lignite.                                                                  |    |              |
| HV6039, Bonasse           | 2.6m parallel laminated very fine sand with silt drapes. Beds typically 5-6 cm thickness.                                                                                                                     |   |              |
| HV6040, Bonasse           | 32m low angle cross stratified sandstone beds with areas of crested and rounded symmetrical ripples. Swaley cross stratified, rare hummocks. Rare to common traces of low diversity (Ophiomorpha, Skolithos). |  |              |

**Supplementary Table 2 - Sample descriptions and photos**

| Sample number & location    | Outcrop or hand specimen description                                                                                                                                                  | Outcrop photo                                                                                                                             | Sample Photo                                                                         |
|-----------------------------|---------------------------------------------------------------------------------------------------------------------------------------------------------------------------------------|-------------------------------------------------------------------------------------------------------------------------------------------|--------------------------------------------------------------------------------------|
| HV5032, Moreau Road, Moruga | Thin section: fU to fL sst. Well cmt/ well consolidated. Greyish green colour. Abundant micas and specs of red-coloured mineral (?). Light fizz, calcareous.                          |  <p style="text-align: center;">Rock is ~ 1.5m wide</p> |   |
| HV5026, Rock River Road     | Fine grained well sorted sandstone. Grey; speckled? Well consolidated, calcareous (vigorous fizz). Common opaques; speckled. Fe staining imparts a rust brown colour, otherwise grey. | n/a – spot sample                                                                                                                         |  |

Supplementary Table 2 - Sample descriptions and photos

| Sample number & location                     | Outcrop or hand specimen description                                                                                                                                           | Outcrop photo                                                                       | Sample Photo                                                                         |
|----------------------------------------------|--------------------------------------------------------------------------------------------------------------------------------------------------------------------------------|-------------------------------------------------------------------------------------|--------------------------------------------------------------------------------------|
| HV5029,<br>Moreau Road                       |                                                                                                                                                                                | n/a – spot sample                                                                   | 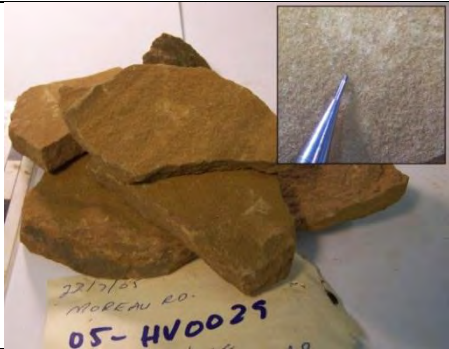  |
| HV5018, Plum Mitan                           | fU to fL sandstone; very well sorted, well consolidated. Brown to yellow in colour. Abundant mica and opaque minerals give speckled appearance to sample.                      |   |   |
| HV5007<br>Esmeralda/<br>Mapepire<br>Junction | 25cm thick bed is upward massive to parallel laminated. Rare ?trace fossil (linear, worm-like trace). Sst grey, fine-lower grain size, very well sorted and well consolidated. |  |  |

**Supplementary Table 2 - Sample descriptions and photos**

| Sample number & location     | Outcrop or hand specimen description                                                                                                    | Outcrop photo                                                                       | Sample Photo                                                                         |
|------------------------------|-----------------------------------------------------------------------------------------------------------------------------------------|-------------------------------------------------------------------------------------|--------------------------------------------------------------------------------------|
| HV5009<br>Kelly Hill         | Fine lower grain size, moderately to well sorted sst; Well consolidated, though signs of weathering. Micaceous, non-calcareous.         | n/a – spot sample                                                                   |   |
| HV5022<br>Corbeaux Hill      |                                                                                                                                         |   |   |
| HV5023<br>Sandstone<br>Trace | vcU, poorly sorted sandstone with a fine sand matrix. Coarser grains sub angular. Quartz rich; friable/ weathered, loosely consolidated |  |  |

**Supplementary Table 2 - Sample descriptions and photos**

| Sample number & location              | Outcrop or hand specimen description                                                                                                                                                                                                           | Outcrop photo                                                                       | Sample Photo                                                                         |
|---------------------------------------|------------------------------------------------------------------------------------------------------------------------------------------------------------------------------------------------------------------------------------------------|-------------------------------------------------------------------------------------|--------------------------------------------------------------------------------------|
| AS 1.9, Kairi 1 well                  | Thin section: Coarse sand up to 1.2 mm, poorly sorted (bi-modal) , dominantly monocrystalline quartz. Lithic fragments include sandstone, carbonate, metamorphic, bioclasts with accessory glauconite, opaques and zircon. Ferruginous cement. | n/a – well sample                                                                   |   |
| HV5001 Bon Aventure, Pointe a Pierre. | Pebbly conglomerate. Dominantly vcU grains within medium (mL-mU) matrix. Pebble sized reddish clasts. Poorly srt; very well cmt; non calcareous.                                                                                               |  |  |

**Supplementary Table 2 - Sample descriptions and photos**

| Sample number & location                  | Outcrop or hand specimen description                                                                                                                                  | Outcrop photo                                                                        | Sample Photo                                                                          |
|-------------------------------------------|-----------------------------------------------------------------------------------------------------------------------------------------------------------------------|--------------------------------------------------------------------------------------|---------------------------------------------------------------------------------------|
| HV7039<br>Soldado Rock                    | Fine to medium grained sandstone; moderately sorted.                                                                                                                  |    |    |
| HV5006<br>Caratal Road<br>Gasparillo      | vcU to granular poorly sorted sst. Partially weathered. Abundant quartz grains. Silty matrix. Grains dom. Sub rounded with planar faces recognizable. Non calcareous. |    |   |
| HV5012<br>Tabaquite sawmill,<br>Tabaquite | Dominantly cU to cL sandstone; poorly sorted, very well consolidated; abundant quartz; white/cream in colour.                                                         |  |  |

**Supplementary Table 2 - Sample descriptions and photos**

| Sample number & location                       | Outcrop or hand specimen description                                                                                                                                                              | Outcrop photo                                                                      | Sample Photo                                                                         |
|------------------------------------------------|---------------------------------------------------------------------------------------------------------------------------------------------------------------------------------------------------|------------------------------------------------------------------------------------|--------------------------------------------------------------------------------------|
| HV5013<br>Allen Road,<br>Tabaquite             | vcU - cU grained quartz-rich sandstone; sub angular - sub rounded. Very well consolidated. Common opaques. Moderately well sorted though this may be apparent due to common cement around grains. |  |   |
| HV5046<br>Fabien Road<br>quarry,<br>Gasparillo | vcL with occasional vcU sst. Moderate sorting. Cream/white in colour; well indurated, non calcareous.                                                                                             |  |  |

**Supplementary Table 2 - Sample descriptions and photos**

| Sample number & location                                    | Outcrop or hand specimen description                                                                                                          | Outcrop photo                                                                       | Sample Photo                                                                         |
|-------------------------------------------------------------|-----------------------------------------------------------------------------------------------------------------------------------------------|-------------------------------------------------------------------------------------|--------------------------------------------------------------------------------------|
| HV6029<br>Chaudiere River, Cunapo Southern road             | fU to mL sandstone. Well indurated; non calcareous; moderate sorting.                                                                         |   |   |
| HV5044<br>Forest Park, "Growing Rock", Cunapo Southern road | vcU poorly sorted sst. Subangular quartz grains in silty matrix; non calcareous. Friable.                                                     |   |   |
| HV5049                                                      | Granular to vcU, very poorly sorted sandstone with a silty matrix. Friable; clast-supported, mod well consolidated. Sub angular quartz grains |  |  |



Supplementary Table 2 - Sample descriptions and photos

| Sample number & location | Outcrop or hand specimen description                                                                                            | Outcrop photo                                                                       | Sample Photo                                                                         |
|--------------------------|---------------------------------------------------------------------------------------------------------------------------------|-------------------------------------------------------------------------------------|--------------------------------------------------------------------------------------|
| <b>BARBADOS SAMPLES</b>  |                                                                                                                                 |                                                                                     |                                                                                      |
| BD 1                     | Max vcU in a very fine sandy matrix. Bi-modal. Non calcareous. Cream in colour.                                                 |   |                                                                                      |
| HV6007                   | Pebble conglomerate. Dominantly granule sized grains with common pebbles and Lithic clasts. Fine sandy matrix. Clast supported. |  |  |

**Supplementary Table 2 - Sample descriptions and photos**

| Sample number & location | Outcrop or hand specimen description                                                                                                 | Outcrop photo                                                                       | Sample Photo                                                                         |
|--------------------------|--------------------------------------------------------------------------------------------------------------------------------------|-------------------------------------------------------------------------------------|--------------------------------------------------------------------------------------|
| HV6008                   | Very poorly sorted, up to granule sized quartz grains. Typically vcU-L. fU sandy matrix.                                             |   |   |
| HV6009                   | Sandstone up to vcL quartz grains. Very poorly sorted. Matrix Fu-FI. Matrix supported. Cream, buff weathered colour. Non calcareous. |  |  |
