# Supplementary material
Source: publisher figshare collection journal article supplement (https://geolsoc.figshare.com/articles/dataset/_/3453668)
Supplement: Supplementary file 2 [file 1]

**Supplementary Figure 1 -**

Vincent, H., Wach, G. Wach., Kettanah, Y., Heavy mineral record of Andean uplift and changing sediment sources across the northeastern margin of South America; a case study from Trinidad and Barbados.

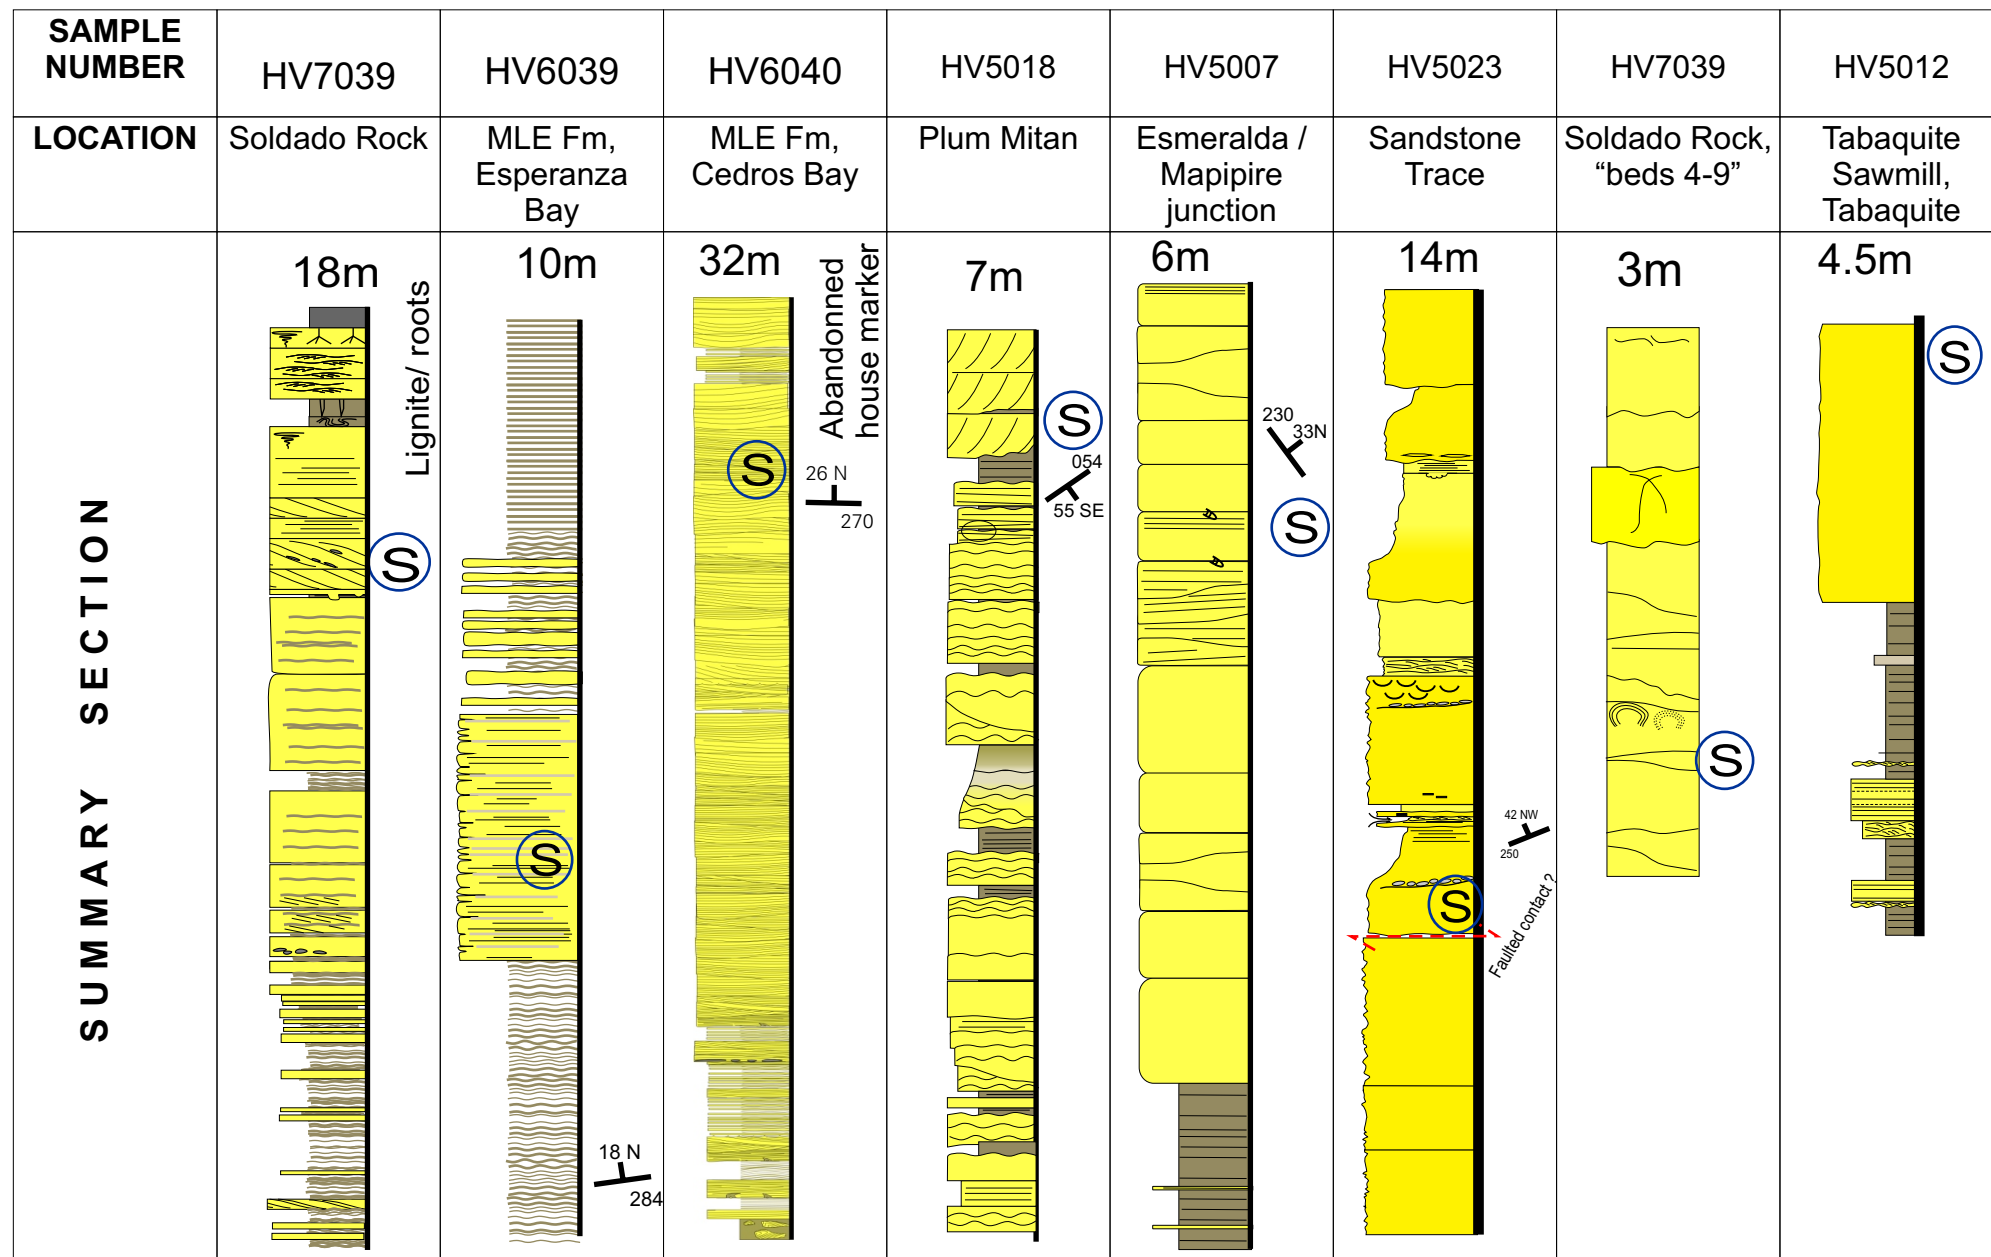

Supplementary Figure 1 - Simplified outcrop sections showing sample positions

**S** Sample point  
m Metres

| SAMPLE NUMBER   | HV5013                                                                                         | HV5046                                                                                         | HV6029                                                                                       | HV5044                                                                                                     | BD 1                                                                                                                                   | HV6007                                                                                                                               | HV6008                                                                                          |
|-----------------|------------------------------------------------------------------------------------------------|------------------------------------------------------------------------------------------------|----------------------------------------------------------------------------------------------|------------------------------------------------------------------------------------------------------------|----------------------------------------------------------------------------------------------------------------------------------------|--------------------------------------------------------------------------------------------------------------------------------------|-------------------------------------------------------------------------------------------------|
| LOCATION        | Allen Road, Tabaquite                                                                          | Fabien Road quarry, Gasparillo                                                                 | Chaudiere River, Cunapo Southern road                                                        | Forest Park (Growing Rock)                                                                                 | Chalky Mount Barbados                                                                                                                  | Coast Road, Barbados                                                                                                                 | Coast Road Barbados                                                                             |
| SUMMARY SECTION | <p>3.2m</p> 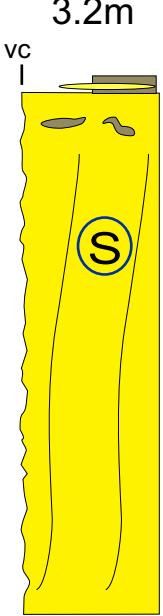 | <p>17 m</p>  | <p>4m</p>  | <p>9m</p> <p>gran</p>  | <p>22m</p> <p>pebble</p> <p>amoured mudclasts</p>  | <p>17m</p> <p>sample projected onto section</p>  | <p>60m</p>  |
|                 |                                                                                                |                                                                                                |                                                                                              |                                                                                                            |                                                                                                                                        |                                                                                                                                      |                                                                                                 |

 Sample point  
 Metres
